# Supplementary material for: Triangular Forearm Support in Rotator Cuff Syndrome a randomized crossover trial with EMG insight into mechanism of action
Source: Research Square preprint supplement (doi:10.21203/rs.3.rs-7895251/v1), 2025-11-14
Supplement: Supplementary file 1 [file c05892bff01f02fa273f5bdc.docx]

CONSORT CHECKLIST

**Table.** CONSORT 2010 Checklist of Information to Include When Reporting a Randomized Triala

Item

Reported on

Section and Topic Title and abstract

2-3

Introduction

|  | | 4 |
| --- | --- | --- |
| and objectives | 2b Specific objectives or hypotheses. | 4 |

Background

No. Checklist Item

1a Identification as a randomized trial in the title

1

1b Structured summary of trial design, methods, results, and conclusions (for specific guidance see CONSORT for abstracts)

2a Scientific background and explanation of rationale

Page No.

Methods

None

4-5

Trial design 3a Description of trial design (such as parallel, factorial) including allocation ratio 5-6

3b Important changes to methods after trial commencement (such as eligibility criteria), with reasons ipants 4a Eligibility criteria for participants

4b Settings and locations where the data were collected 4

Interventions 5 The interventions for each group with sufficient details to allow replication, including how and when they were actually administered

5-6

Outcomes 6a Completely defined prespecified primary and secondary outcome measures, including how and when they were assessed

5

n/a

6

n/a

6b Any changes to trial outcomes after the trial commenced, with reasons

Sample size 7a How sample size was determined

7b When applicable, explanation of any interim analyses and stopping guidelines

Randomization Sequence

|  | | 5 |
| --- | --- | --- |
| generation | 8b Type of randomization; details of any restriction (such as blocking and block size) | 5 |

8a Method used to generate the random allocation sequence

Allocation concealment mechanism

5

9 Mechanism used to implement the random allocation sequence (such as sequentially numbered containers), describing any steps taken to conceal the sequence until interventions were assigned

Implementation 10 Who generated the random allocation sequence, who enrolled participants, and who assigned participants to interventions

5

Blinding 11a If done, who was blinded after assignment to interventions (for example, participants, care providers, those assessing outcomes) and how

5

|  | 11b | If relevant, description of the similarity of interventions | 6 |
| --- | --- | --- | --- |
| Statistical | 12a | Statistical methods used to compare groups for primary and secondary outcomes | 6 |
| methods | 12b | Methods for additional analyses, such as subgroup analyses and adjusted analyses | 7 |
| Results  Participant flow | 13a | For each group, the numbers of participants who were randomly assigned, received intended treatment, |  |
| (a diagram is strongly |  | and were analyzed for the primary outcome Figure 2 and page 8 | 7 |
| recommended) | 13b | For each group, losses and exclusions after randomization, together with reasons Figure 3 and page 8 | 7 |
| Recruitment | 14a | Dates defining the periods of recruitment and follow-up | 4 |
|  | 14b | Why the trial ended or was stopped | n/a |
| Baseline data | 15 | A table showing baseline demographic and clinical characteristics for each group | Table 1 |
| Numbers analyzed | 16 | For each group, number of participants (denominator) included in each analysis and whether the analysis |  |

Outcomes

and estimation

|  | | Page 8 and supp. table 1 |
| --- | --- | --- |
|  | 17b For binary outcomes, presentation of both absolute and relative effect sizes is recommended | 8 |

was by original assigned groups Figure 3 and page 8

17a For each primary and secondary outcome, results for each group, and the estimated effect size and its precision (such as 95% confidence interval)

7

Print Form

Ancillary analyses 18 Results of any other analyses performed, including subgroup analyses and adjusted analyses, distinguishing

| prespecified from exploratory |  |
| --- | --- |
| Harms 19 All important harms or unintended effects in each group (for specific guidance see CONSORT for harms) | 7 |

Comment

| Limitations | 20 | Trial limitations, addressing sources of potential bias, imprecision, and, if relevant, multiplicity of analyses | 10 |
| --- | --- | --- | --- |
| Generalizability | 21 | Generalizability (external validity, applicability) of the trial findings | 9 |
| Interpretation | 22 | Interpretation consistent with results, balancing benefits and harms, and considering other relevant 10 evidence10 |  |

Other information

| Registration | 23 | Registration number and name of trial registry | 1 |
| --- | --- | --- | --- |
| Protocol | 24 | Where the full trial protocol can be accessed, if available | 4 |
| Funding | 25 | Sources of funding and other support (such as supply of drugs), role of funders | 1 |

a We strongly recommend reading this statement in conjunction with the CONSORT 2010 Explanation and Elaboration for important clarifications on all the items. If relevant, we also recommend reading CONSORT extensions for cluster randomized trials, noninferiority and equivalence trials, nonpharmacological treatments, herbal interventions, and pragmatic trials. Additional extensions are forthcoming: for those and for up-to-date references relevant to this checklist, see [http://www.consort-statement.org.](http://www.consort-statement.org/)

**©2010 American Medical Association. All rights reserved.** (Reprinted) JAMA, July 7, 2010—Vol 304, No. 1 **E1**
